# Supplementary material
Source: publisher figshare collection journal article supplement (https://tandf.figshare.com/ndownloader/files/14515031)
Supplement: Supplementary file 1 [file 14515031]

Supplemental Material

Solubilization of C60 using ultrasound and amphiphilic block copolymers

in acidic aqueous solutions

YANXIA WANG1, TING HE2, HENG YANG1, MING GAO1, ZHIHUA CHAI1*

1Department of Environmental Engineering, North China Institute of Science and Technology, PO Box 206, Yan jiao, Beijing 101601, China.

2Sany Heavy Industry Co., Ltd.

Correspondence:chaizhihua5077@163.com

***
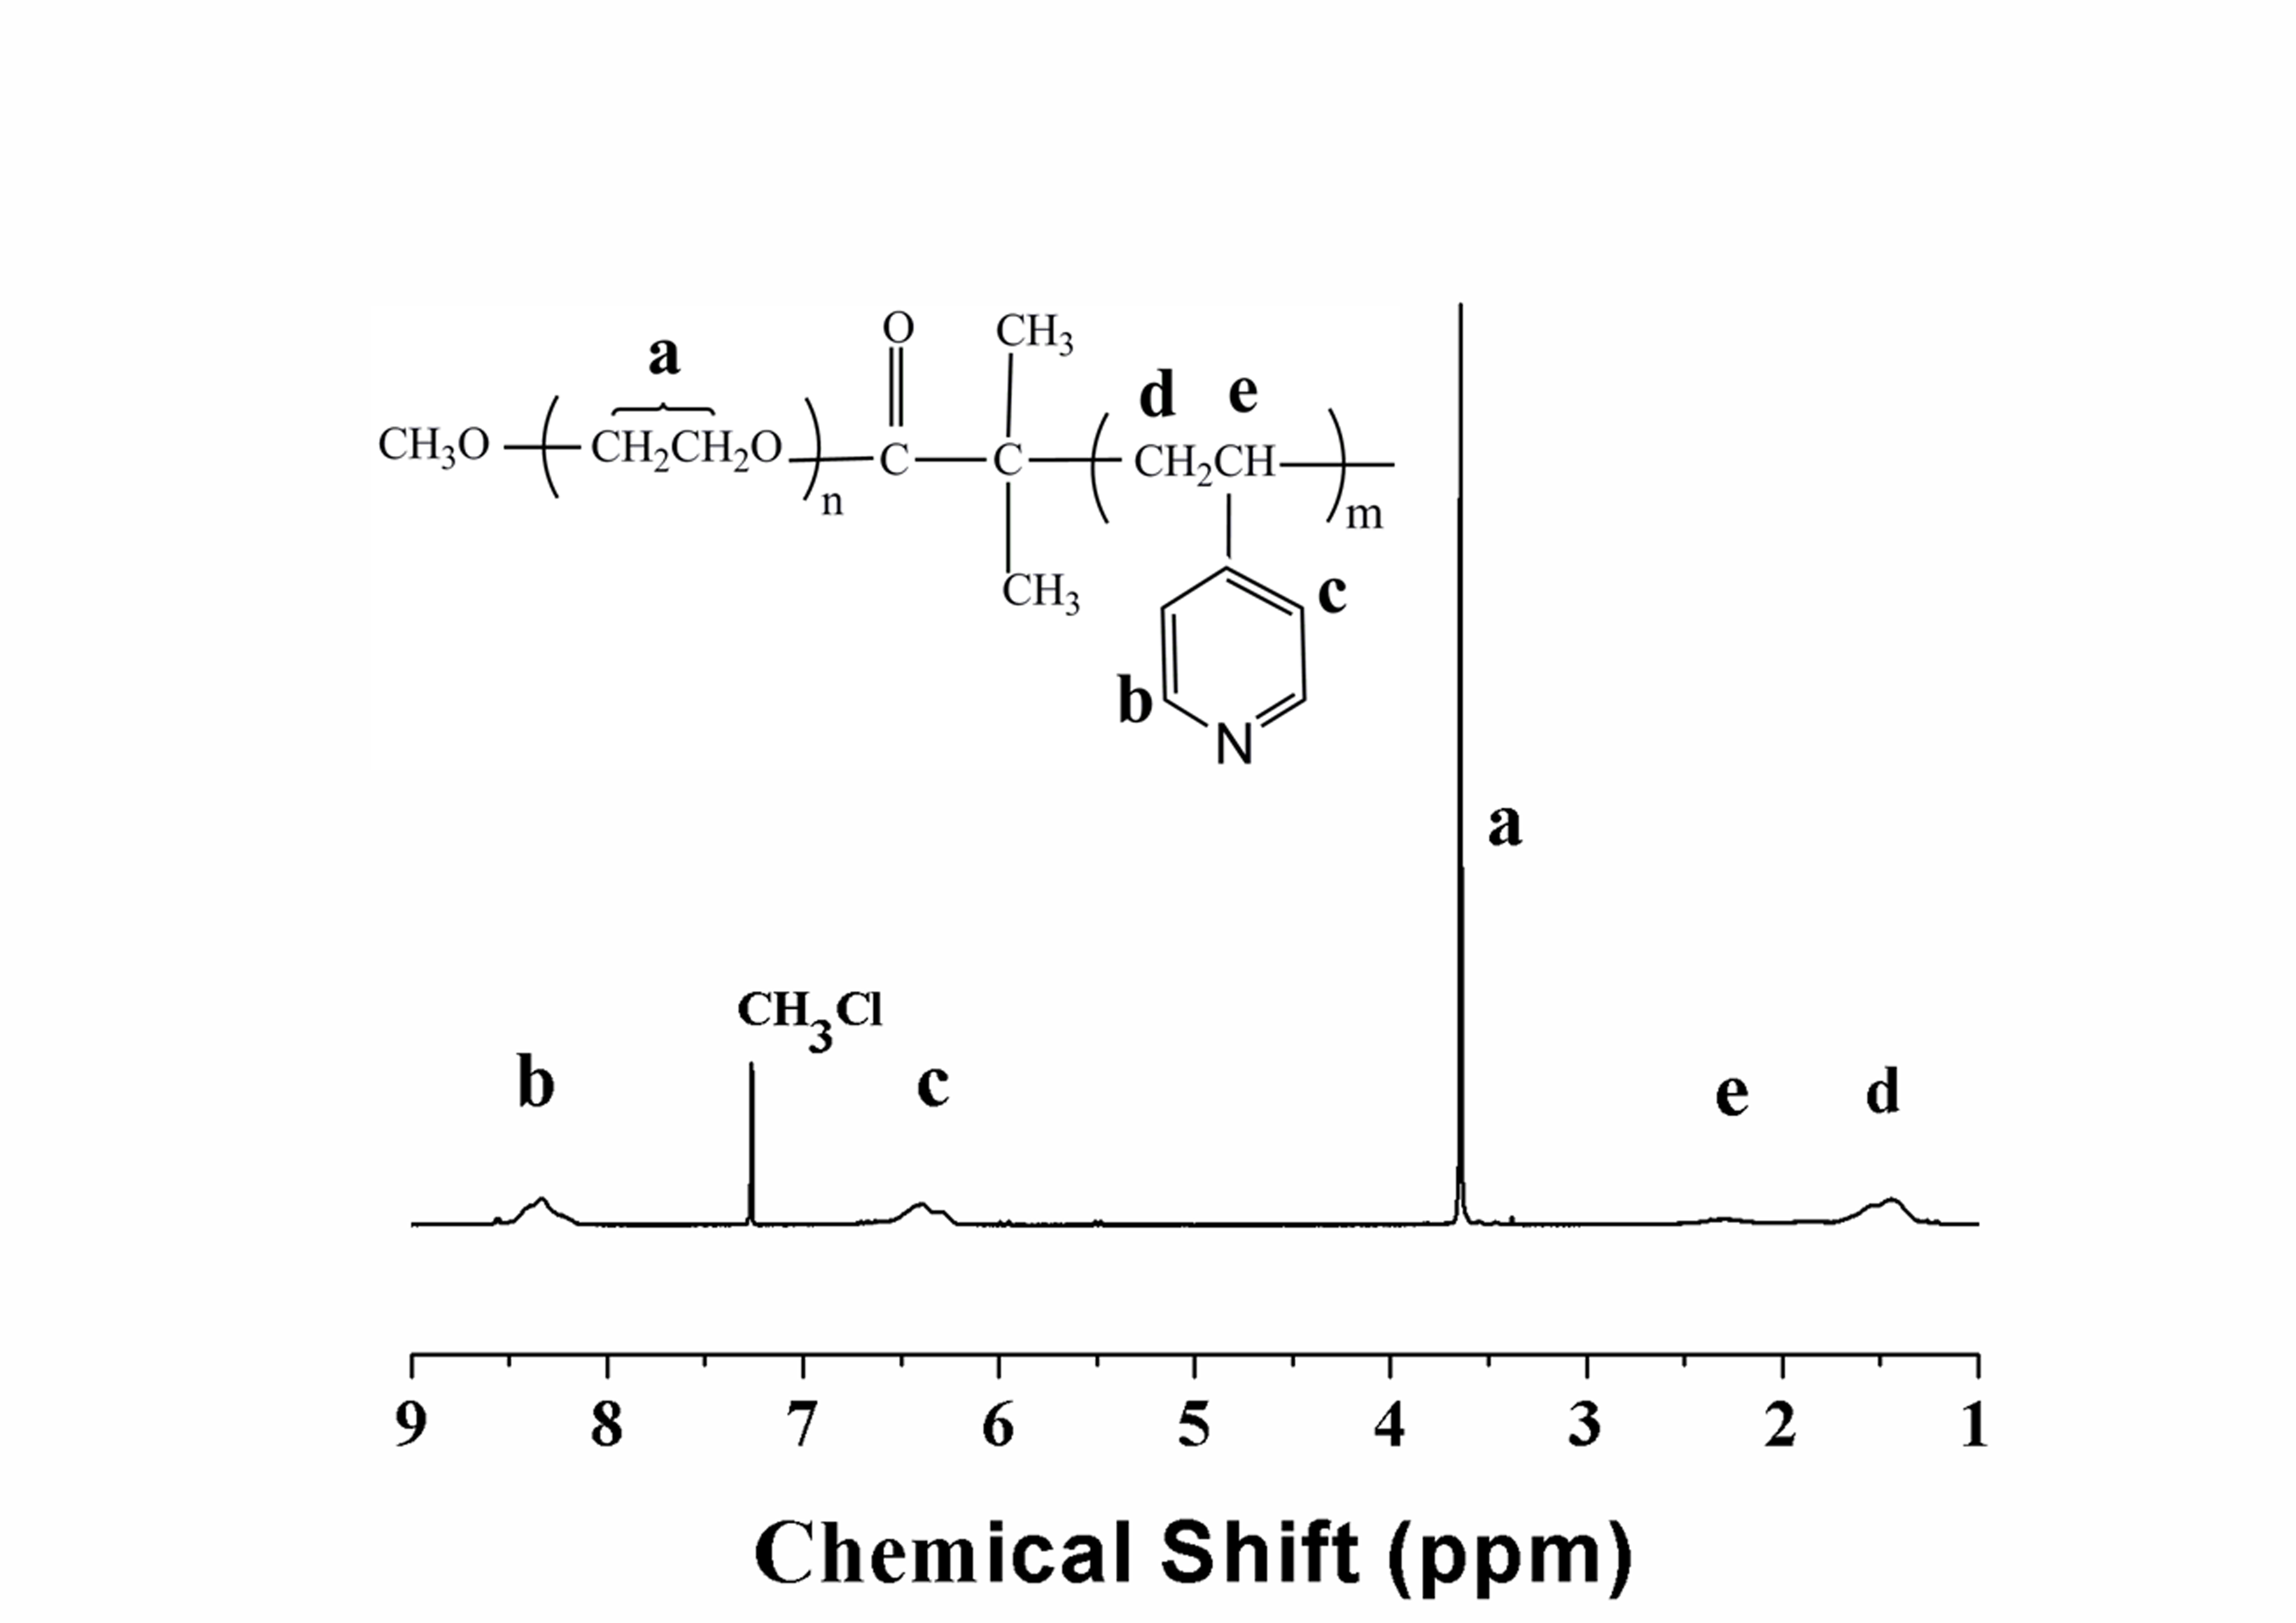
***

Fig S1. 1H NMR spectra of PEG-*b*-P4VP in CDCl3.

Fig. S2 GPC traces for PEG-*b*-P4VP

***Table S1 Detailed data of DLS and Zeta potential changes of the PEG-b-P4VP/C60 micelles with different pH values.***

| **PEG-*b*-P4VP/C60** | **pH=2.4** | **pH=4.4** | **pH=7.4** |
| --- | --- | --- | --- |
| ***D*h/nm** | 200±4.1 | 188.4±3.5 | 165.6±3.3 |
| **Zeta** **potential /mv** | 37.1±6.1 | 11.2±3.7 | 0.1±1.5 |

Fig. S3 A standard curve of C60/toluene solutions from 0.002 to 0.04 mg/ml

Fig.S4 UV-vis absorption spectra of PEG-*b*-P4VP/C60 micelles with different ultrasound time.

Fig S5.Hydrodynamic diameter distributions of the PEG-*b*-P4VP/ZnTPPS micelles .

***

***

Fig S6. TEM image of the PEG-*b*-P4VP/ZnTPPS micelles.
